# Supplementary material
Source: PubMed Central journal article supplement (PMC2875072)
Supplement: NIHMS199926-supplement-2.pdf [file NIHMS199926-supplement-2.pdf]

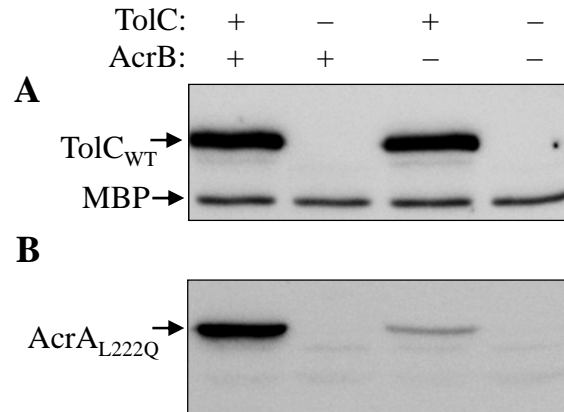

**Supplemental Fig. 1.** A requirement of the tripartite complex for AcrA<sub>L222Q</sub> stabilization. AcrA<sub>L222Q</sub>'s stability was determined in the presence (+) or absence (-) of TolC and/or AcrB. Two identical sets of protein samples, obtained from cultures grown overnight at 37°C, were analyzed by SDS-PAGE and electro-blotted onto PVDF membrane. Proteins were detected by Western blot analysis using antibodies against TolC-MBP (A) and AcrA<sub>6His</sub> (B). All proteins were expressed from genes present at their normal chromosomal locations.

1 **Table S1.** Primers used for site-directed mutagenesis<sup>a</sup>.

2

| Alterations                                     | Primer sequence (5' to 3')                                                                                                  |
|-------------------------------------------------|-----------------------------------------------------------------------------------------------------------------------------|
| TolC <sub>147</sub> GC deletion                 | Forward: CCAACGTTTTAACGTGGCTGGTAGCGATCACCG<br>Reverse: CGGTGATCGCTACCAGCCACGTTAAAACGTTGG-3                                  |
| TolC <sub>150</sub> GC insertion                | Forward: CCAACGTTTTAACGTGGCTGGTAGCGGCATCACCGACGTGCAGAACG<br>Reverse: CGTTCTGCACGTCCGGTATGCCGCTACCAGCCACGTTAAAACGTTGG        |
| TolC <sub>A147G</sub>                           | Forward: CAACGTTTTAACGTGGGGGGTAGCGGCATCACCG<br>Reverse: GGTGATGCCGCTACCCCCACGTTAAAACGTTG                                    |
| TolC <sub>L148S</sub>                           | Forward: CCAACGTTTTAACGTGGGCTCCGTAGCGATCACCGACGTGC<br>Reverse: GCACGTCGGTATCGCTACGGAGCCCACGTTAAAACGTTGG                     |
| TolC <sub>V149S</sub>                           | Forward: CGTTTTAACGTGGCCTGTCAGCGATCACCGACGTGCAG<br>Reverse: CTGCACGTCGGTATCGCTGACAGGCCACGTTAAAACG                           |
| TolC <sub>A150G</sub>                           | Forward: CGTTTTAACGTGGCCTGTCAGGGATCACCGACGTGCAGAACGC<br>Reverse: GCGTTCTGCACGTCCGGTATCCCTGACAGGCCACGTTAAAACG                |
| TolC <sub>G147A</sub>                           | Forward: CCCAACGTTTTAACGTGGcCCTGGTAGCGATCACCG<br>Reverse: CGGTGATCGCTACCAGGGCCACGTTAAAACGTTGGG                              |
| TolC <sub>148AA149</sub>                        | Forward: CCAACGTTTTAACGTGGGcGcAGCGATCACCGACGTGCAGAACGC<br>Reverse: GCGTTCTGCACGTCCGGTATCGCTgCCgC GCCACGTTAAAACGTTGG         |
| TolC <sub>147AAA149</sub>                       | Forward: CCACCCAACGTTTTAACGTGGcCgGcAGCGATCACCGACGTGCAGAACGC<br>Reverse: GCGTTCTGCACGTCCGGTATCGCTgCCgCgCCACGTTAAAACGTTGGGTGG |
| TolC <sub>147AG148→GL</sub>                     | Forward: CCAACGTTTTAACGTGGGGCTGAGCGGCATCACCGACGTGC<br>Reverse: GCACGTCGGTATGCCGCTCAGCCCCACGTTAAAACGTTGG                     |
| TolC <sub>Q142C</sub> (WT)                      | Forward: CCGTCAATTAGATCAAACCACctgtCGTTTTAACGTG<br>Reverse: CACGTTAAAACGacaGGTGGTTTGTATCTAATTGACGG                           |
| TolC <sub>Q142C</sub> (Turn 1 quadruple mutant) | Forward: GCGATCTACCGTCAATTAGATtgtACCACCCAACGTTTTAACGTG<br>Reverse: CGCTAGATGGCAGTTAATCTAacaTGGTGGGTTGCAAAATTGCAC            |
| AcrA <sub>S83G</sub>                            | Forward: CCTATCAGGCGACATACGACgGTGCGAAAGGTGATCTGGCG<br>Reverse: CGCCAGATCACCTTTCGCACcGTCGTATGTCGCCTGATAGG                    |

3 <sup>a</sup>Other primer sequence information is available upon request.

1 **Table S2.** Minimum inhibitory concentrations ( $\mu\text{g/ml}$ ) of carbonyl cyanide *m*-  
2 chlorophenylhydrazine (CCCP) against various *Escherichia coli* strains.

3

| Strains                                  | MIC  |
|------------------------------------------|------|
| Wild type                                | 8-16 |
| $\Delta\text{acrAB}$                     | 4-8  |
| $\Delta\text{emrAB}$                     | 4-8  |
| $\Delta\text{acrAB}, \Delta\text{emrAB}$ | 2-4  |
| $\Delta\text{tolC}$                      | 1    |

4 MIC values were determined by a two-fold dilution method. The inhibitor was mixed with  
5 approximately  $5 \times 10^5$  cell/ml. Cultures were incubated for 18 h at 37°C without shaking.

1 **Table S3.** Effect of AcrA suppressors on TolC and AcrA levels in TolC turn 1 <sup>147</sup>AGSG<sub>150</sub>  
 2 quadruple mutant and TolC wild-type backgrounds.

3

| AcrA protein          | TolC turn 1 mutant |             | TolC wild type |             |
|-----------------------|--------------------|-------------|----------------|-------------|
|                       | TolC levels        | AcrA levels | TolC levels    | AcrA levels |
| AcrA <sub>WT</sub>    | 0.50               | 1.00        | 1.00           | 1.00        |
| AcrA <sub>S83G</sub>  | 0.48               | 1.01        | 1.05           | 0.93        |
| AcrA <sub>T111P</sub> | 0.54               | 0.64        | 0.87           | 0.66        |
| AcrA <sub>A135T</sub> | 0.59               | 1.12        | 0.97           | 1.49        |
| AcrA <sub>T153P</sub> | 0.49               | 1.09        | 0.89           | 1.40        |
| AcrA <sub>L252R</sub> | 0.58               | 0.94        | 1.00           | 1.25        |

4 Proteins levels were determined from 2 to 4 independent Western blots, with a margin of  
 5 error of 10% or less.
